# Supplementary material
Source: PubMed Central journal article supplement (PMC5834694)
Supplement: pnas.1716855115.sapp.pdf [file pnas.1716855115.sapp.pdf]

# Supplemental Information Appendix

## Suppl. Figure 1. 2bp overhang results in templated insertions

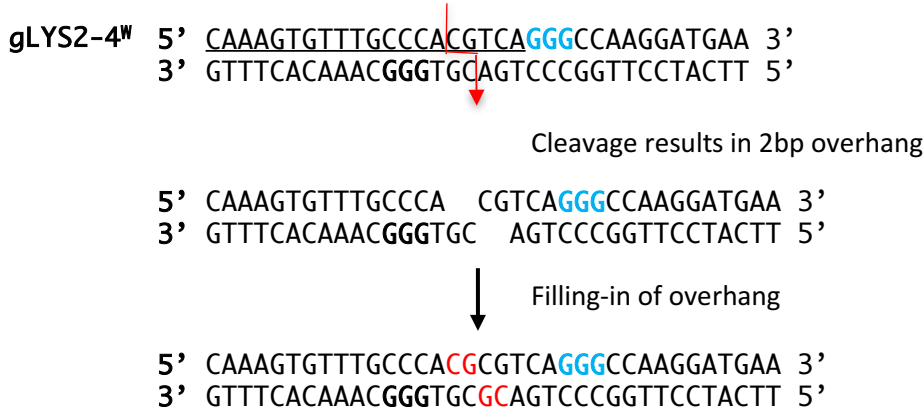

**A.**

| gMAT $\alpha$ -1               |       |           | gMAT $\alpha$ -2               |       |           |
|--------------------------------|-------|-----------|--------------------------------|-------|-----------|
| 5' CAAATGCAGCACGGAATATGGG 3'   |       |           | 5' TATTACTCACAGTTTGGCTCCGG 3'  |       |           |
| Mutation                       | Indel | Frequency | Mutation                       | Indel | Frequency |
| CACGGA <b>A</b> ATATGGG        | +1    | 8         | GTTTGG <b>C</b> CTCCGG         | +1    | 10        |
| CACGGATATATGGG                 | +1    | 6         | GTTTGG <b>G</b> CTCCGG         | +1    | 4         |
| CACGG-ATATGGG                  | -1    | 4         | GTTT <b>A</b> GGGCTCCGG        | +2    | 4         |
| CACGGA <b>AA</b> ATATGGG       | +2    | 1         | GTTTGG <b>CC</b> CTCCGG        | +2    | 1         |
| <i>pol4<math>\Delta</math></i> |       |           | <i>pol4<math>\Delta</math></i> |       |           |
| CACGG-ATATGGG                  | -1    | 9         | GTTTGG- <b>T</b> CCGG          | -1    | 18        |
| CACGGA-----                    | -8    | 8         | GTTTGG <b>G</b> CTCCGG         | +1    | 2         |
| CACGGAA-----                   | -6    | 2         | GTTTG- <b>CT</b> CCGG          | -1    | 4         |
| CACG-AATA <b>I</b> GGG         | -1    | 1         | GTTTGGC-- <b>CGG</b>           | -2    | 1         |

**B.**

| gMATa-1                        |       |           | gMATa-2                        |       |           |
|--------------------------------|-------|-----------|--------------------------------|-------|-----------|
| 5' TTTATAAAATTATACTGTTGCGG 3'  |       |           | 5' ATCAATATCACCCCAAGCACGGG 3'  |       |           |
| Mutation                       | Indel | Frequency | Mutation                       | Indel | Frequency |
| ATACT <b>G</b> GTTGCGG         | +1    | 4         | CCCCA-GCAC <b>G</b> GGG        | -1    | 16        |
| ATACT <b>GT</b> GTTGCGG        | +2    | 4         | CCCCAA <b>A</b> GCACGGG        | +1    | 10        |
| ATAC---TG <b>CGG</b>           | -3    | 2         | CCCCAA <b>AA</b> GCACGGG       | +2    | 1         |
| ATACTG <b>TTT</b> GCGG         | +1    | 3         | CCCCAA <b>CC</b> GCACGGG       | +2    | 1         |
| ATACTG <b>TTTT</b> GCGG        | +3    | 2         |                                |       |           |
| ATACT <b>TTT</b> GTTGCGG       | +2    | 1         |                                |       |           |
| ATACT <b>GGG</b> GTTGCGG       | +3    | 1         |                                |       |           |
| ATA---TTG <b>CGG</b>           | -3    | 1         |                                |       |           |
| <i>pol4<math>\Delta</math></i> |       |           | <i>pol4<math>\Delta</math></i> |       |           |
| ATACT-TTG <b>CGG</b>           | -1    | 10        | CCCCA-GCAC <b>G</b> GGG        | -1    | 16        |
| ATA-----C                      | -13   | 3         |                                |       |           |
| ATAC---TG <b>CGG</b>           | -3    | 3         |                                |       |           |
| ATACT--TG <b>CGG</b>           | -2    | 2         |                                |       |           |
| ATA---TTG <b>CGG</b>           | -3    | 1         |                                |       |           |
| TTT-----TAA                    | -650  | 1         |                                |       |           |

**C.**

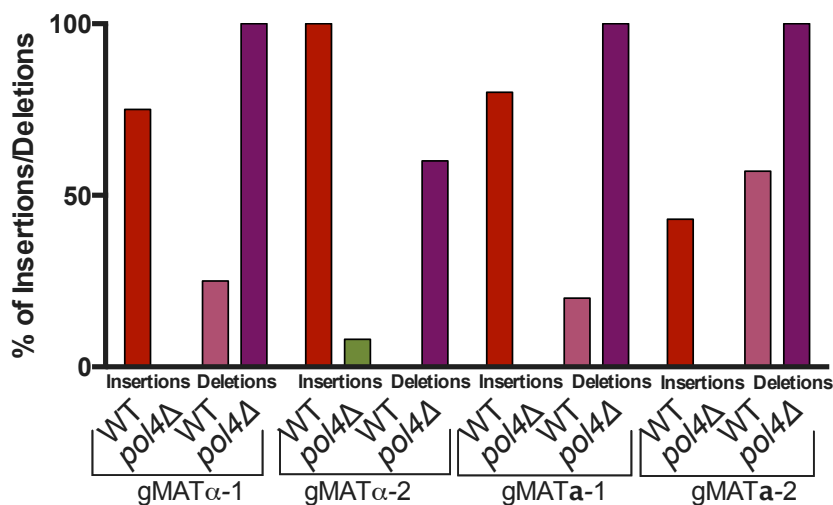

**Suppl. Figure 3.** Deletions in *LYS2* with blunt cleavage versus 5' overhang cleavage.

**A**

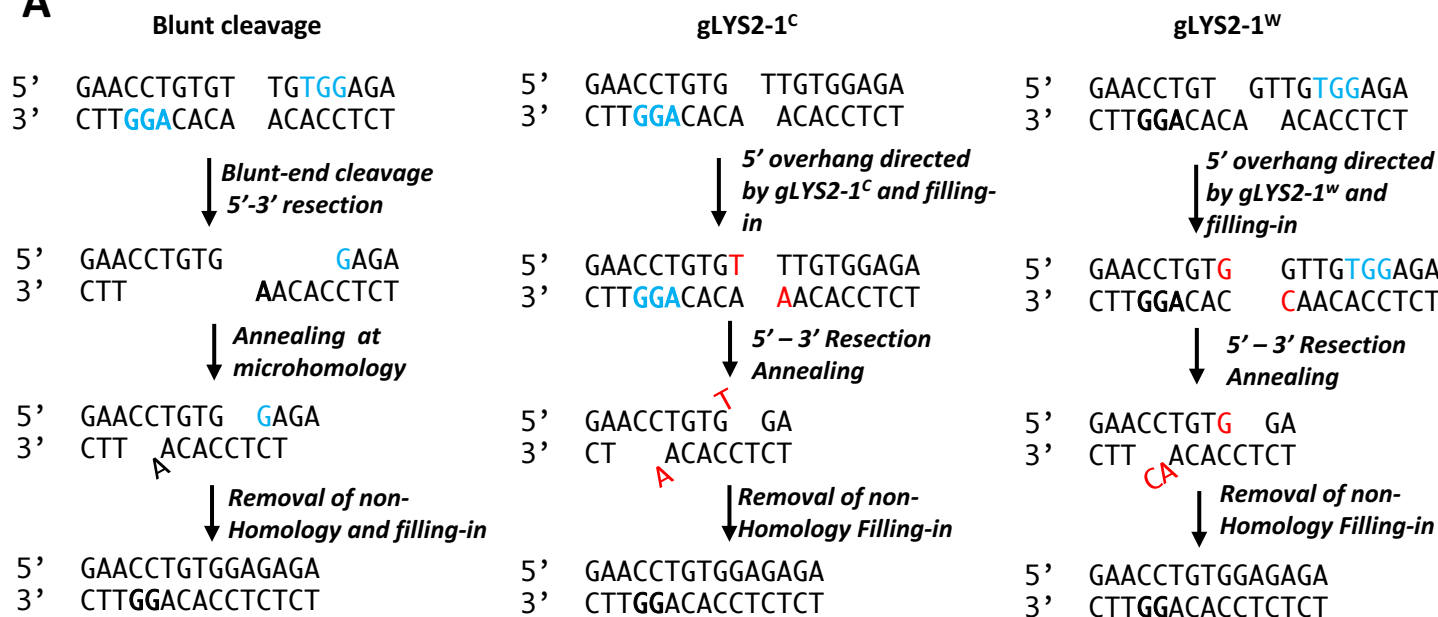

**B**

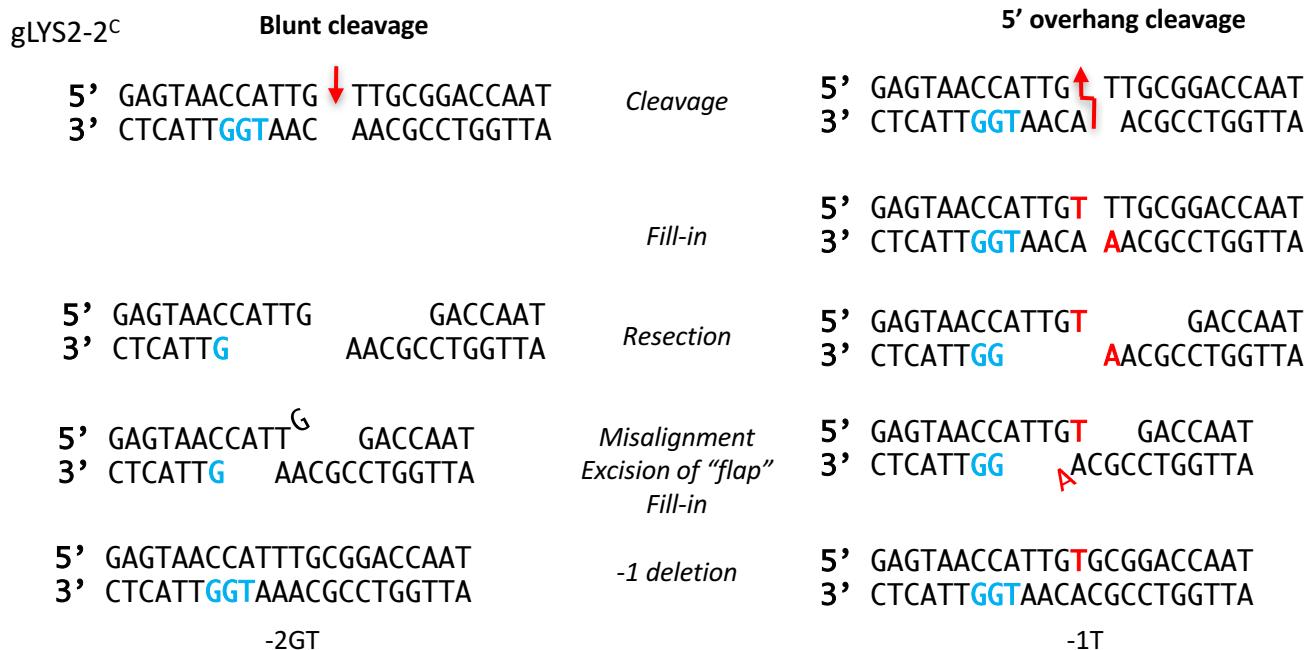

**A****TTG deletion after blunt-end cleavage**

Suppl. Figure 4

5' TGAAAGAGTAACCATTG TTG**CGG**ACCAATTTACT  
 3' ACTTTCTCATT**GGT**AAC AACGCCTGGTTAAATGA

↓ Blunt-end cleavage  
 ↓ 5'-3' resection

5' TGAAAGAGTAACCATTG ACCAATTTACT  
 3' ACTTTCTCATT AACGCCTGGTTAAATGA

↓ Annealing

5' TGAAAGAGTAACCATTG ACCAATTTACT  
 3' ACTTTCTCATT AACGCCTGGTTAAATGA

↓ Filling-in

5' TGAAAGAGTAACCATTGCGGACCAATTTACT  
 3' ACTTTCTCATTGGTAACGCCTGGTTAAATGA

**B****TTG deletion mediated by gLYS2-2<sup>W</sup> with 5' overhang**

5' TGAAAGAGTAACCATT GTT**CGG**ACCAATTTACT  
 3' ACTTTCTCATTGGTAAC AACGCCTGGTTAAATGA

↓ 5' overhang  
 ↓ 5'-3' resection

5' TGAAAGAGTAACCATT**G** GACCAATTTACT  
 3' ACTTTCTCATTG **C**AACGCCTGGTTAAATGA

↓ Annealing

5' TGAAAGAGTAACCATT**G** GACCAATTTACT  
 3' ACTTTCTCATTG **C**AACGCCTGGTTAAATGA

↓ Filling-in

5' TGAAAGAGTAACCATTGCGGACCAATTTACT  
 3' ACTTTCTCATTGGTAACGCCTGGTTAAATGA

**C****TTG deletion mediated by gLYS2-2<sup>C</sup> with 5' overhang**

5' TGAAAGAGTAACCATTG TTG**CGG**ACCAATTTACT  
 3' ACTTTCTCATT**GGT**AACA ACGCCTGGTTAAATGA

↓ 5' overhang, fill-in  
 ↓ 5'-3' resection

5' TGAAAGAGTAACCATTG**T** GACCAATTTACT  
 3' ACTTTCTCAT **A**ACGCCTGGTTAAATGA

↓ Annealing

5' TGAAAGAGTAACCATTG**T** GACCAATTTACT  
 3' ACTTTCTCAT **A**ACGCCTGGTTAAATGA

↓ Filling-in

5' TGAAAGAGTAACCATTGCGGACCAATTTACT  
 3' ACTTTCTCATTGGTAACGCCTGGTTAAATGA

## Suppl. Figure 5. Effect of Mre11 on Cas9-mediated NHEJ

gMAT $\alpha$ -1

| 5' CAAAATGCAGCACGGAATATGGG                 | Indel     | Frequency |
|--------------------------------------------|-----------|-----------|
| <i>mre11<math>\Delta</math></i>            |           |           |
| CAAAATGCAGCACGGA-TATGGG                    | -1        | 6         |
| CAAAATGCAGCACGGAATATGGG                    | No change | 2         |
| <i>mre11<math>\Delta</math> + mre11--3</i> |           |           |
| CAAAATGCAGCACGG-ATATGGG                    | -1        | 8         |
| CAAAATGCAGCACGGAATATGGG                    | +1        | 3         |
| CAAAATGCAGCACGGAATATGGG                    | +2        | 2         |
| CAAAATGCAGCACG--ATATGGG                    | -2        | 1         |
| CAAAATGCAGCA-----TGGG                      | -7        | 1         |
| CAAAATGCAGCACGGATATATGGG                   | +1        | 1         |
| CAAAATGCAGCA-----TATGGG                    | -5        | 1         |
| CAAAATGCAGCACGGATAATATGGG                  | +2        | 1         |
| CAAAATGCAGCACGGATATGATATGGG                | +4        | 1         |
| CAAAATGCAGCACGGAAAAAATATGGG                | +6        | 1         |
| <i>mre11<math>\Delta</math> + mre11-4</i>  |           |           |
| CAAAATGCAGCACGGA-TATGGG                    | -1        | 4         |
| CAAAATGCAGCACGGAATATGGG                    | +1        | 2         |

## Suppl. Figure 6. Templated Insertions in *CAN1*

gRNA *CAN1* Target

5' GATACGTTCTCTATGGAGGATGG 3'

| 5' CTATGGAGGATGG | Indel | Frequency | Microhomology |
|------------------|-------|-----------|---------------|
| CTATGGAAGGATGG   | +1    | 29%       | -             |
| CTATGG-----      | -7    | 24%       | TGG           |
| CTATGG-GGATGG    | -1    | 10%       | -             |
| CTATGGAAGGATGG   | +1    | 10%       | -             |
| CTATGGAAGGATGG   | +4    | 5%        | -             |
| CTATGGAAGGATGG   | +2    | 2%        | -             |
| CTATGG--GATGG    | -2    | 2%        | -             |
| CTATGGATGGATGG   | +1    | 2%        | -             |
| CTATGGA--ATGG    | -2    | 2%        | -             |
| CTATGGAG-ATGG    | -1    | 2%        | -             |
| CTATGGAACGGATGG  | +2    | 2%        | -             |
| CTATGGAATGGATGG  | +2    | 2%        | -             |
| CTATGGAAGGATGG   | +5    | 2%        | -             |
| CTATGGAATGGATGG  | +5    | 2%        | -             |

n =41

**Suppl. Table 1: gRNA Chromosomal Target Sequences used in this paper**

| <b>gRNA</b>                 | <b>Chromosomal Target</b>  | <b>PAM</b> | <b>Strand</b>   |
|-----------------------------|----------------------------|------------|-----------------|
| <i>MAT</i> $\alpha$ gRNA #1 | 5' CAAAATGCAGCACGGAATAT 3' | GGG        |                 |
| <i>MAT</i> $\alpha$ gRNA #2 | 5' TATTACTCACAGTTTGGCTC 3' | CGG        |                 |
| <i>MAT</i> $\alpha$ gRNA #1 | 5' TTTATAAAATTATACTGTTG 3' | CGG        |                 |
| <i>MAT</i> $\alpha$ gRNA #2 | 5' ATCAATATCACCCCAAGCAC 3' | GGG        |                 |
| <i>gCAN1-1W</i>             | 5' TCACAAACACACCACAGACG 3' | TGG        | Non-transcribed |
| <i>gCAN1-1C</i>             | 5' ATGGTATTGACCCACGTCTG 3' | TGG        | Transcribed     |
| <i>gLYS2-1W</i>             | 5' CCCAGAGAGAACCTGTGTTG 3' | TGG        | Non-transcribed |
| <i>gLYS2-1C</i>             | 5' TGTTGGAGTCTCCACAACAC 3' | AGG        | Transcribed     |
| <i>gLYS2-2W</i>             | 5' TGAAAGAGTAACCATTGTTG 3' | CGG        | Transcribed     |
| <i>gLYS2-2C</i>             | 5' AGTAAATTGGTCCGCAACAA 3' | TGG        | Non-transcribed |
| <i>gLYS2-3W</i>             | 5' TGCGGAAGACGCCAAGAAAT 3' | TGG        | Transcribed     |
| <i>gLYS2-3C</i>             | 5' TAGCGTCTCAACCAATTTCT 3' | TGG        | Non-transcribed |
| <i>gLYS2-4W</i>             | 5' CAAAGTGTTTGCCACGTCA 3'  | GGG        | Transcribed     |
| <i>gLYS2-4C</i>             | 5' TTCATCCTTGGCCCTGACGT 3' | GGG        | Non-transcribed |
| <i>CAN1</i>                 | 5' GATACGTTCTCTATGGAGGA 3' | TGG        | Non-transcribed |

Supplemental Table 2

| gRNA | Lys2+/- | Insertion(+)<br>Deletions(-) | Sequence                                                                                                     | Microhomology | Frequency | %<br>Normalized |
|------|---------|------------------------------|--------------------------------------------------------------------------------------------------------------|---------------|-----------|-----------------|
| 1w   | WT      | NA                           | CCCTT <b>CCCAGAGAGA</b> ACCTGTG <b>TGG</b> AGACTCCAACACTAAA                                                  | -             | -         | -               |
| 1w   | Lys2-   | -14                          | CCCTTCCCAGAGAGAACCT-----CCAACACTAAA                                                                          | 2 CT          | 22        | 20.4%           |
| 1w   | Lys2-   | -5                           | CCCTTCCCAGAGAGAACCTGTG---- <b>G</b> AGACTCCAACACTAAA                                                         |               | 14        | 13.0%           |
| 1w   | Lys2-   | +1                           | CCCTTCCCAGAGAGAACCTGT <b>G</b> TTG <b>TGG</b> AGACTCCAACACTAAA                                               |               | 9         | 8.3%            |
| 1w   | Lys2-   | -2                           | CCCTTCCCAGAGAGAACCTGT-- <b>TG</b> <b>TGG</b> AGACTCCAACACTAAA                                                | 2 GT          | 7         | 6.5%            |
| 1w   | Lys2-   | -16                          | CCCTTCCCAGAGAGA-----CTCCAACACTAAA                                                                            | 4 GAGA        | 9         | 8.3%            |
| 1w   | Lys2-   | +2                           | CCCTTCCCAGAGAGAACCTGTGGG <b>TT</b> TTG <b>TGG</b> AGACTCCAACACTAAA                                           |               | 5         | 4.6%            |
| 1w   | Lys2+   | bps G-> T                    | CCCTTCCCAGAGAGAACCTGTGTT <b>T</b> <b>TGG</b> AGACTCCAACACTAAA                                                |               | 5         | 4.6%            |
| 1w   | Lys2-   | +1                           | CCCTTCCCAGAGAGAACCTGTG <b>A</b> TTG <b>TGG</b> AGACTCCAACACTAAA                                              |               | 5         | 4.6%            |
| 1w   | Lys2-   | +1                           | CCCTTCCCAGAGAGAACCTGTG <b>T</b> TTG <b>TGG</b> AGACTCCAACACTAAA                                              |               | 3         | 2.8%            |
| 1w   | Lys2-   | -1                           | CCCTTCCCAGAGAGAACCTGT- <b>TTG</b> <b>TGG</b> AGACTCCAACACTAAA                                                |               | 3         | 2.8%            |
| 1w   | Lys2-   | +2                           | CCCTTCCCAGAGAGAACCTGT <b>GG</b> TTG <b>TGG</b> AGACTCCAACACTAAA                                              |               | 2         | 1.9%            |
| 1w   | Lys2+   | -3                           | CCCTTCCCAGAGAGAACCTGTGT-- <b>GG</b> AGACTCCAACACTAAA                                                         | 3 TGT         | 2         | 1.9%            |
| 1w   | Lys2-   | -17                          | CCCTTCCCAGAGAGAACC-----AACACTAAA<br>CCCTTCCCAGAGAGAACCTGTGT <b>GTGGGTGTGGG</b> TG <b>TGG</b> AGACTCCAACACTAA | 2 CC          | 2         | 1.9%            |
| 1w   | Lys2-   | +11                          | A                                                                                                            |               | 1         | 0.9%            |
| 1w   | Lys2-   | +4                           | CCCTTCCCAGAGAGAACCTGTG <b>AAAA</b> TTG <b>TGG</b> AGACTCCAACACTAAA                                           |               | 1         | 0.9%            |
| 1w   | Lys2+   | +3                           | CCCTTCCCAGAGAGAACCTGT <b>GGG</b> GTTG <b>TGG</b> AGACTCCAACACTAAA                                            |               | 1         | 0.9%            |
| 1w   | Lys2-   | -40                          | CCCTTCCCAGAGAGAACC-----<br>----GTT                                                                           | 2 CC          | 1         | 0.9%            |
| 1w   | Lys2-   | -37                          | CCCT-----AAA                                                                                                 | 2 CT          | 1         | 0.9%            |
| 1w   | Lys2-   | -29                          | CCCT-----CCAACACTAAA                                                                                         | 2 CT          | 1         | 0.9%            |
| 1w   | Lys2-   | -29                          | C-----ACTCCAACACTAAA                                                                                         |               | 1         | 0.9%            |
| 1w   | Lys2+   | -28                          | CCCTTCC-----AACACTAAA                                                                                        | 3 TCC         | 1         | 0.9%            |
| 1w   | Lys2+   | -18                          | CCCTTCCCAGAGA-----ACTCCAACACTAAA                                                                             | 2 GA          | 1         | 0.9%            |
| 1w   | Lys2-   | -16                          | CCCTTCCCAGAGAGAACC-----CAACACTAAA                                                                            | 1 C           | 1         | 0.9%            |
| 1w   | Lys2-   | -16                          | CCCTTCCCAGAGAGAACCT-----AACACTAAA                                                                            |               | 1         | 0.9%            |
| 1w   | Lys2-   | -16                          | CCCTTCCCAGAGAGAAC-----TCCAACACTAAA                                                                           | 1 C           | 1         | 0.9%            |
| 1w   | Lys2+   | -15                          | CCCTTCCCAGAGAGAACC-----CCAACACTAAA                                                                           |               | 1         | 0.9%            |
| 1w   | Lys2+   | -15                          | CCCTTCCCAGAGAGAACCT-----CAACACTAAA                                                                           |               | 1         | 0.9%            |
| 1w   | Lys2-   | -14                          | CCCTTCCCAGAGAGAACCTG-----CAACACTAAA                                                                          |               | 1         | 0.9%            |
| 1w   | Lys2-   | -14                          | CCCTTCCCAGAGAGAAC-----CTCCAACACTAAA                                                                          | 2 CT          | 1         | 0.9%            |



| 1w          | Lys2-          | -13                                  | CCCTTCCCAGAGAGA-----AGACTCCAACACTAAA                               | 1                    | A                | 1                       | 0.9%   |
|-------------|----------------|--------------------------------------|--------------------------------------------------------------------|----------------------|------------------|-------------------------|--------|
| 1w          | Lys2-          | -13                                  | CCCTTCCCAGAGAGAACCTG-----CCAACACTAAA                               |                      |                  | 1                       | 0.9%   |
| 1w          | Lys2-          | -1                                   | CCCTTCCCAGAGAGAACCTGTGT- <b>TGG</b> AGACTCCAACACTAAA               |                      |                  | 1                       | 0.9%   |
| 1w          | Lys2+          | bps T -> G                           | CCCTTCCCAGAGAGAACCTG <b>G</b> TT <b>TGG</b> AGACTCCAACACTAAA       |                      |                  | 1                       | 0.9%   |
|             |                |                                      |                                                                    |                      |                  | 108                     | 100.0% |
| <b>gRNA</b> | <b>Lys2+/-</b> | <b>Insertion(+)<br/>Deletions(-)</b> | <b>Sequence</b>                                                    | <b>Microhomology</b> | <b>Frequency</b> | <b>%<br/>Normalized</b> |        |
| 1c          | WT             | NA                                   | GAGAA <b>CCTGTGTTGTGGAGACTCCAACACT</b> AAATTCCGACA                 |                      |                  |                         |        |
| 1c          | Lys2-          | -16                                  | GAGA-----CTCCAACACTAAATTCGACA                                      | 4                    | GAGA             | 43                      | 42.2%  |
| 1c          | Lys2-          | -14                                  | GAGAA <b>CCT</b> -----CCAACACTAAATTCGACA                           | 2                    | CT               | 28                      | 27.5%  |
| 1c          | Lys2+          | -3                                   | GAGAA <b>CCT</b> GTGT---GGAGACTCCAACACTAAATTCGACA                  | 3                    | TGT              | 6                       | 5.9%   |
| 1c          | Lys2-          | +1                                   | GAGAA <b>CCT</b> GTGT <b>T</b> TTGTGGAGACTCCAACACTAAATTCGACA       |                      |                  | 7                       | 6.9%   |
| 1c          | Lys2-          | +1                                   | GAGAA <b>CCT</b> GTGT <b>G</b> TTGTGGAGACTCCAACACTAAATTCGACA       |                      |                  | 3                       | 2.9%   |
| 1c          | Lys2+          | +3                                   | GAGAA <b>CCT</b> GTGT <b>TTT</b> TTGTGGAGACTCCAACACTAAATTCGACA     |                      |                  | 4                       | 3.9%   |
| 1c          | Lys2-          | -17                                  | GAGAA <b>CC</b> -----AACACTAAATTCGACA                              | 2                    | CC               | 2                       | 2.0%   |
| 1c          | Lys2-          | -2                                   | GAGAA <b>CCT</b> GT--TGTGGAGACTCCAACACTAAATTCGACA                  | 2                    | GT               | 2                       | 2.0%   |
| 1c          | Lys2-          | -1                                   | GAGAA <b>CCT</b> GTG-TGTGGAGACTCCAACACTAAATTCGACA                  | 1                    | T                | 2                       | 2.0%   |
| 1c          | Lys2-          | +2                                   | GAGAA <b>CCT</b> GTGT <b>TT</b> TTGTGGAGACTCCAACACTAAATTCGACA      |                      |                  | 2                       | 2.0%   |
| 1c          | Lys2+          | +3                                   | GAGAA <b>CCT</b> GTGT <b>GGG</b> TGTGGAGACTCCAACACTAAATTCGACA      |                      |                  | 1                       | 1.0%   |
| 1c          | Lys2-          | +2                                   | GAGAA <b>CCT</b> GTGT <b>GG</b> TTGTGGAGACTCCAACACTAAATTCGACA      |                      |                  | 1                       | 1.0%   |
| 1c          | Lys2-          | +1                                   | GAGAA <b>CCT</b> GTGT <b>A</b> TTGTGGAGACTCCAACACTAAATTCGACA       |                      |                  | 1                       | 1.0%   |
|             |                |                                      |                                                                    |                      |                  | 102                     | 100.0% |
| <b>gRNA</b> | <b>Lys2+/-</b> | <b>Insertion(+)<br/>Deletions(-)</b> | <b>Sequence</b>                                                    | <b>Microhomology</b> | <b>Frequency</b> | <b>%<br/>Normalized</b> |        |
| 2w          | WT             | NA                                   | TCGAA <b>TGAAAAGAGTAACCATTGTTGCGG</b> ACCAATTTACTCAATA             |                      |                  |                         |        |
| 2w          | Lys2+          | -3                                   | TCGAATGAAAAGAGTAACCATTG--- <b>CGG</b> ACCAATTTACTCAATA             | 3                    | TTG              | 61                      | 58.1%  |
| 2w          | Lys2-          | +1                                   | TCGAATGAAAAGAGTAACCATT <b>G</b> TT <b>GCGG</b> ACCAATTTACTCAATA    |                      |                  | 10                      | 9.5%   |
| 2w          | Lys2-          | +1                                   | TCGAATGAAAAGAGTAACCATT <b>G</b> TT <b>GCGG</b> ACCAATTTACTCAATA    |                      |                  | 9                       | 8.6%   |
| 2w          | Lys2-          | +1                                   | TCGAATGAAAAGAGTAACCATT <b>G</b> TT <b>GCGG</b> ACCAATTTACTCAATA    |                      |                  | 5                       | 4.8%   |
| 2w          | Lys2-          | +2                                   | TCGAATGAAAAGAGTAACCATT <b>GTT</b> TT <b>GCGG</b> ACCAATTTACTCAATA  |                      |                  | 6                       | 5.7%   |
| 2w          | Lys2+          | +3                                   | TCGAATGAAAAGAGTAACCATT <b>GTTT</b> TT <b>GCGG</b> ACCAATTTACTCAATA |                      |                  | 3                       | 2.9%   |
| 2w          | Lys2-          | +2                                   | TCGAATGAAAAGAGTAACCATT <b>GG</b> TT <b>GCGG</b> ACCAATTTACTCAATA   |                      |                  | 2                       | 1.9%   |
| 2w          | Lys2-          | -17                                  | TCGAATGAAAAGA-----CCAATTTACTCAATA                                  | 2                    | GA               | 1                       | 1.0%   |
| 2w          | Lys2-          | -1                                   | TCGAATGAAAAGAGTAACCATTGTT- <b>CGG</b> ACCAATTTACTCAATA             |                      |                  | 1                       | 1.0%   |

|    |       |            |                                                                     |     |        |
|----|-------|------------|---------------------------------------------------------------------|-----|--------|
| 2w | Lys2- | +4         | TCGAATGAAAAGAGTAACCATTG <b>TTTT</b> TTG <b>CGG</b> ACCAATTTACTCAATA | 1   | 1.0%   |
| 2w | Lys2+ | +3         | TCGAATGAAAAGAGTAACCATTG <b>GTG</b> TTG <b>CGG</b> ACCAATTTACTCAATA  | 1   | 1.0%   |
| 2w | Lys2+ | +3         | TCGAATGAAAAGAGTAACCATTG <b>ATA</b> TTG <b>CGG</b> ACCAATTTACTCAATA  | 1   | 1.0%   |
| 2w | Lys2- | +2         | TCGAATGAAAAGAGTAACCATTG <b>CC</b> TTG <b>CGG</b> ACCAATTTACTCAATA   | 1   | 1.0%   |
| 2w | Lys2- | +1         | TCGAATGAAAAGAGTAACCATTG <b>AA</b> TTG <b>CGG</b> ACCAATTTACTCAATA   | 1   | 1.0%   |
| 2w | Lys2- | +1         | TCGAATGAAAAGAGTAACCATTG <b>C</b> TTG <b>CGG</b> ACCAATTTACTCAATA    | 1   | 1.0%   |
| 2w | Lys2+ | bps T -> G | TCGAATGAAAAGAGTAACCATTGT <b>g</b> <b>CGG</b> ACCAATTTACTCAATA       | 1   | 1.0%   |
|    |       |            |                                                                     | 105 | 100.0% |

| gRNA | Lys2+/- | Insertion(+)<br>Deletions(-) | Sequence                                                                   | Microhomology | Frequency | %<br>Normalized |
|------|---------|------------------------------|----------------------------------------------------------------------------|---------------|-----------|-----------------|
| 2c   | WT      | NA                           | TATTCGAATGAAAAGAGTAA <b>CCA</b> TTG <b>TTG</b> <b>CGG</b> ACCAATTTACTCAATA | -             |           |                 |
| 2c   | Lys2-   | +1                           | TATTCGAATGAAAAGAGTAA <b>CCA</b> TTG <b>T</b> TTGCGGACCAATTTACTCAATA        |               | 55        | 35.5%           |
| 2c   | Lys2-   | -1                           | TATTCGAATGAAAAGAGTAA <b>CCA</b> TTG-TGCGGACCAATTTACTCAATA                  | 1 T           | 23        | 14.8%           |
| 2c   | Lys2+   | -3                           | TATTCGAATGAAAAGAGTAA <b>CCA</b> TTG---CGGACCAATTTACTCAATA                  | 3 TTG         | 15        | 9.7%            |
| 2c   | Lys2-   | +1                           | TATTCGAATGAAAAGAGTAA <b>CCA</b> TTG <b>G</b> TTGCGGACCAATTTACTCAATA        |               | 12        | 7.7%            |
| 2c   | Lys2-   | +2                           | TATTCGAATGAAAAGAGTAA <b>CCA</b> TTG <b>TT</b> TTGCGGACCAATTTACTCAATA       |               | 11        | 7.1%            |
| 2c   | Lys2+   | +3                           | TATTCGAATGAAAAGAGTAA <b>CCA</b> TTG <b>TTT</b> TTGCGGACCAATTTACTCAATA      |               | 8         | 5.2%            |
| 2c   | Lys2-   | -13                          | TATTCGAATGAAAAGAGTAA <b>CCA</b> -----ATTTACTCAATA                          | 4 ACCA        | 8         | 5.2%            |
| 2c   | Lys2-   | +1                           | TATTCGAATGAAAAGAGTAA <b>CCA</b> TTG <b>C</b> TTGCGGACCAATTTACTCAATA        |               | 4         | 2.6%            |
| 2c   | Lys2-   | +2                           | TATTCGAATGAAAAGAGTAA <b>CCA</b> TTG <b>GG</b> TTGCGGACCAATTTACTCAATA       |               | 3         | 1.9%            |
| 2c   | Lys2+   | +3                           | TATTCGAATGAAAAGAGTAA <b>CCA</b> TTG <b>AAA</b> TTGCGGACCAATTTACTCAATA      |               | 2         | 1.3%            |
| 2c   | Lys2-   | -13                          | TATTCGAATGAAAAGAGTAA <b>CCA</b> TT-----TTACTCAATA                          | 1 T           | 2         | 1.3%            |
| 2c   | Lys2-   | -40                          | TATTCGAATGAAAAGAGTAA <b>CCA</b> ----TGCGGACCAATTTACTCAATA                  | 1 T           | 1         | 0.6%            |
| 2c   | Lys2-   | +1                           | TATTCGAATGAAAAGAGTAA <b>CCA</b> TTG <b>A</b> TTGCGGACCAATTTACTCAATA        |               | 1         | 0.6%            |
| 2c   | Lys2+   | -6                           | TATTCGAATGAAAAGAGTAA <b>CCA</b> TTG-----ACCAATTTACTCAATA                   | 1 G           | 1         | 0.6%            |
| 2c   | Lys2+   | +3                           | TATTCGAATGAAAAGAGTAA <b>CCA</b> TTG <b>CCC</b> TTGCGGACCAATTTACTCAATA      |               | 1         | 0.6%            |
| 2c   | Lys2+   | +3                           | TATTCGAATGAAAAGAGTAA <b>CCA</b> TTG <b>GGG</b> TTGCGGACCAATTTACTCAATA      |               | 1         | 0.6%            |
| 2c   | Lys2+   | +3                           | TATTCGAATGAAAAGAGTAA <b>CCA</b> TTGT <b>ATT</b> TTGCGGACCAATTTACTCAATA     |               | 1         | 0.6%            |
| 2c   | Lys2-   | +2                           | TATTCGAATGAAAAGAGTAA <b>CCA</b> TTG <b>AA</b> TTGGGACCAATTTACTCAATA        |               | 1         | 0.6%            |
| 2c   | Lys2-   | +2                           | TATTCGAATGAAAAGAGTAA <b>CCA</b> TTG <b>CT</b> TTGGGACCAATTTACTCAATA        |               | 1         | 0.6%            |
| 2c   | Lys2+   | +3                           | TATTCGAATGAAAAGAGTAA <b>CCA</b> TTG <b>TTG</b> TTGCGGACCAATTTACTCAATA      |               | 1         | 0.6%            |
| 2c   | Lys2+   | bps C-> A                    | TATTCGAATGAAAAGAGTAA <b>CCA</b> TTGTTG <b>a</b> GGACCAATTTACTCAATA         |               | 1         | 0.6%            |
| 2c   | Lys2-   | -1                           | TATTCGAATGAAAAGAGTAA <b>CCA</b> TT-TGCGGACCAATTTACTCAATA                   |               | 1         | 0.6%            |
| 2c   | Lys2+   | bps G-> A                    | TATTCGAATGAAAAGAGTAA <b>CCA</b> TT <b>a</b> TTGCGGACCAATTTACTCAATA         |               | 1         | 0.6%            |

| gRNA | Lys2+/- | Insertion(+)<br>Deletions(-) | Sequence                                                                  | Microhomology | Frequency | %<br>Normalized |
|------|---------|------------------------------|---------------------------------------------------------------------------|---------------|-----------|-----------------|
| 3w   | WT      | NA                           | TCACTGCAAATTA <b>TCGGGAAGACGCCAAGAAAT</b> TGGTTGAGACGCTACCAAG             |               | 155       | 100.0%          |
| 3w   | Lys2-   | -1                           | TCACTGCAAATTATGCGGAAGACGCCAAG-AAT <b>TGG</b> TTGAGACGCTACCAAG             | 1 A           | 36        | 56.3%           |
| 3w   | Lys2-   | -20                          | TCACTGCAAATTATGCGGAAGACGC-----TACCAAG                                     | 2 GC          | 7         | 10.9%           |
| 3w   | Lys2+   | bps A->G                     | TCACTGCAAATTATGCGGAAGACGCCAAG <b>g</b> AAT <b>TGG</b> TTGAGACGCTACCAAG    |               | 6         | 9.4%            |
| 3w   | Lys2+   | bps G->A                     | TCACTGCAAATTATGCGGAAGACGCCAA <b>a</b> AAAT <b>TGG</b> TTGAGACGCTACCAAG    |               | 4         | 6.3%            |
| 3w   | Lys2+   | bps G->T                     | TCACTGCAAATTATGCGGA <b>t</b> ACGCCAGGAAAT <b>TGG</b> TTGAGACGCTACCAAG     |               | 2         | 3.1%            |
| 3w   | Lys2-   | -19                          | TCACTGCAAATTATGCGGAAG-----GACGCTACCAAG                                    |               | 1         | 1.6%            |
| 3w   | Lys2+   | -3                           | TCACTGCAAATTATGCGGAAGACGCCAAG--- <b>TGG</b> TTGAGACGCTACCAAG              |               | 1         | 1.6%            |
| 3w   | Lys2+   | -3                           | TCACTGCAAATTATGCGGAAGACGCCAA---AT <b>TGG</b> TTGAGACGCTACCAAG             | 1 A           | 1         | 1.6%            |
| 3w   | Lys2-   | -1                           | TCACTGCAAATTATGCGGAAGACGCCAAGAAA- <b>TGG</b> TTGAGACGCTACCAAG             | 1 T           | 1         | 1.6%            |
| 3w   | Lys2+   | +3                           | TCACTGCAAATTATGCGGAAGACGCCAAG <b>AAA</b> AAAT <b>TGG</b> TTGAGACGCTACCAAG |               | 1         | 1.6%            |
| 3w   | Lys2-   | +2                           | TCACTGCAAATTATGCGGAAGACGCCAAG <b>AA</b> AAAT <b>TGG</b> TTGAGACGCTACCAAG  |               | 1         | 1.6%            |
| 3w   | Lys2-   | +2                           | TCACTGCAAATTATGCGGAAGACGCCAAG <b>TT</b> AT <b>TGG</b> TTGAGACGCTACCAAG    |               | 1         | 1.6%            |
| 3w   | Lys2+   | bps AA->CC                   | TCACTGCAAATTATGCGGAAGACGCC <b>cc</b> GAAAT <b>TGG</b> TTGAGACGCTACCAAG    |               | 1         | 1.6%            |
| 3w   | Lys2+   | bps G->A                     | TCACTGCAAATTATGC <b>a</b> GGAAGACGCCAAGAAAT <b>TGG</b> TTGAGACGCTACCAAG   |               | 1         | 1.6%            |
|      |         |                              |                                                                           |               | 64        | 100.0%          |

| gRNA | Lys2+/- | Insertion(+)<br>Deletions(-) | Sequence                                                                   | Microhomology | Frequency | %<br>Normalized |
|------|---------|------------------------------|----------------------------------------------------------------------------|---------------|-----------|-----------------|
| 3c   | WT      | NA                           | ATGCGGAAGACG <b>CCA</b> AGAAAT <b>TGGTTGAGACGCTA</b> CCAAGTTCGTA           |               |           |                 |
| 3c   | Lys2-   | +1                           | ATGCGGAAGACG <b>CCA</b> AGAA <b>A</b> AT <b>TGGTTGAGACGCTA</b> CCAAGTTCGTA |               | 28        | 50.9%           |
| 3c   | Lys2-   | -1                           | ATGCGGAAGACG <b>CCA</b> AGA-AT <b>TGGTTGAGACGCTA</b> CCAAGTTCGTA           |               | 21        | 38.2%           |
| 3c   | Lys2-   | -1                           | ATGCGGAAGACG <b>CCA</b> -GAAAT <b>TGGTTGAGACGCTA</b> CCAAGTTCGTA           |               | 1         | 1.8%            |
| 3c   | Lys2+   | bps G->A                     | ATGCGGAAGACG <b>CCA</b> AGAAAT <b>TGGTTGA</b> <b>a</b> ACGCTACCAAGTTCGTA   |               | 1         | 1.8%            |
| 3c   | Lys2-   | -20                          | ATGCGGAAGACG <b>C</b> -----TACCAAGTTCGTA                                   | 1 C           | 1         | 1.8%            |
| 3c   | Lys2-   | -20                          | ATGCGGAAGACG <b>CCA</b> -----CCAAGTTCGTA                                   | 1 A           | 1         | 1.8%            |
| 3c   | Lys2-   | -2                           | ATGCGGAAGACG <b>CCA</b> AGA-- <b>TGGTTGAGACGCTA</b> CCAAGTTCGTA            | 1 A           | 1         | 1.8%            |
| 3c   | Lys2+   | bps A->C                     | ATGCGGAAGACG <b>CC</b> cAGAAAT <b>TGGTTGAGACGCTA</b> CCAAGTTCGTA           |               | 1         | 1.8%            |

| gRNA | Lys2+/- | Insertion(+)<br>Deletions(-) | Sequence | Microhomology | Frequency | %<br>Normalized |
|------|---------|------------------------------|----------|---------------|-----------|-----------------|
|      |         |                              |          |               | 55        | 100.0%          |

|    |       |          |    |                                                                          |   |     |     |        |
|----|-------|----------|----|--------------------------------------------------------------------------|---|-----|-----|--------|
| 4w | Lys2+ | WT       | NA | TTTCAAAGTGT <b>TTGCCACGTCAGGG</b> CCAAGGATGAAG                           |   |     |     |        |
| 4w | Lys2+ | bps A->C |    | TTTCAAAGTGT <b>TTGCC</b> <u>c</u> CGTCA <b>GGG</b> CCAAGGATGAAG          |   |     | 25  | 18.8%  |
| 4w | Lys2- | -1       |    | TTTCAAAGTGT <b>TTGCCAC</b> -TC <b>AGGG</b> CCAAGGATGAAG                  |   |     | 25  | 18.8%  |
| 4w | Lys2+ | -12      |    | TTTCAAAGTGT <b>TTGCC</b> -----AAGGATGAAG                                 | 3 | GCC | 18  | 13.5%  |
| 4w | Lys2- | +1       |    | TTTCAAAGTGT <b>TTGCCAC</b> <b>GG</b> TCA <b>GGG</b> CCAAGGATGAAG         |   |     | 17  | 12.8%  |
| 4w | Lys2- | -11      |    | TTTCAAAGTGT <b>TTGCCA</b> -----AGGATGAAG                                 | 3 | CCA | 16  | 12.0%  |
| 4w | Lys2- | +2       |    | TTTCAAAGTGT <b>TTGCCAC</b> <b>CG</b> TCA <b>GGG</b> CCAAGGATGAAG         |   |     | 6   | 4.5%   |
| 4w | Lys2- | +1       |    | TTTCAAAGTGT <b>TTGCCAC</b> <b>CG</b> TCA <b>GGG</b> CCAAGGATGAAG         |   |     | 5   | 3.8%   |
| 4w | Lys2- | -16      |    | TTTCAAAG----- <b>GG</b> CCAAGGATGAAG                                     | 1 | G   | 4   | 3.0%   |
| 4w | Lys2- | -1       |    | TTTCAAAGTGT <b>TTGCC</b> -ACGTCA <b>GGG</b> CCAAGGATGAAG                 |   |     | 3   | 2.3%   |
| 4w | Lys2+ | bps G->T |    | TTTCAAAGTGT <b>TT</b> <u>t</u> CCCAC <b>TTCA</b> <b>GGG</b> CCAAGGATGAAG |   |     | 3   | 2.3%   |
| 4w | Lys2+ | -30      |    | TTTCAAAGTGT <b>TTGC</b> -----A                                           | 3 | TGC | 1   | 0.8%   |
| 4w | Lys2+ | -12      |    | TTTCAAAGTGT <b>T</b> ----- <b>GG</b> CCAAGGATGAAG                        |   |     | 1   | 0.8%   |
| 4w | Lys2- | -11      |    | TTTCAAAGTGT <b>TTGCCA</b> -----AGGATGAAG                                 | 3 | CCA | 1   | 0.8%   |
| 4w | Lys2- | -10      |    | TTTCAAAGTGT-----CA <b>GGG</b> CCAAGGATGAAG                               | 1 | T   | 1   | 0.8%   |
| 4w | Lys2- | -7       |    | TTTCAAAGTGT <b>TTGCC</b> ----- <b>GGG</b> CCAAGGATGAAG                   | 2 | CA  | 1   | 0.8%   |
| 4w | Lys2+ | -6       |    | TTTCAAAGTGT <b>TTGCC</b> ----- <b>AGGG</b> CCAAGGATGAAG                  | 1 | C   | 1   | 0.8%   |
| 4w | Lys2- | -2       |    | TTTCAAAGTGT <b>TTGCCA</b> --TC <b>AGGG</b> CCAAGGATGAAG                  |   |     | 1   | 0.8%   |
| 4w | Lys2- | -1       |    | TTTCAAAGTGT <b>TTGCCA</b> -GTCA <b>GGG</b> CCAAGGATGAAG                  |   |     | 1   | 0.8%   |
| 4w | Lys2- | +2       |    | TTTCAAAGTGT <b>TTGCCAC</b> <b>GG</b> TCA <b>GGG</b> CCAAGGATGAAG         |   |     | 1   | 0.8%   |
| 4w | Lys2- | +1       |    | TTTCAAAGTGT <b>TTGCCAC</b> <b>CG</b> TCA <b>GGG</b> CCAAGGATGAAG         |   |     | 1   | 0.8%   |
| 4w | Lys2- | +1       |    | TTTCAAAGTGT <b>TTGCCAC</b> <b>GA</b> TCA <b>GGG</b> CCAAGGATGAAG         |   |     | 1   | 0.8%   |
| 4w | Lys2+ | bps T->G |    | TTTCAAAGTGT <b>TTGCCAC</b> <b>G</b> CA <b>GGG</b> CCAAGGATGAAG           |   |     | 1   | 0.8%   |
|    |       |          |    |                                                                          |   |     | 133 | 100.0% |

| gRNA | Lys2+/- | Insertion(+)<br>Deletions(-) | Sequence                                                                 | Microhomology | Frequency | %<br>Normalized |
|------|---------|------------------------------|--------------------------------------------------------------------------|---------------|-----------|-----------------|
| 4c   | Lys+ WT | NA                           | AAAGTGT <b>TTGCC</b> <b>ACGTCAGGG</b> CCAAGGATGAAGAAAGCT                 |               |           |                 |
| 4c   | Lys2-   | +1                           | AAAGTGT <b>TTGCC</b> <b>ACG</b> <b>G</b> TCAGGGCCAAGGATGAAGAAAGCT        |               |           | 7 12.5%         |
| 4c   | Lys2-   | -1                           | AAAGTGT <b>TTGCC</b> <b>ACG</b> -CAGGGCCAAGGATGAAGAAAGCT                 |               |           | 5 8.9%          |
| 4c   | Lys2+   | -12                          | AAAGTGT <b>TTGCC</b> <b>CC</b> -----AAGGATGAAGAAAGCT                     | 3             | GCC       | 4 7.1%          |
| 4c   | Lys2-   | -11                          | AAAGTGT <b>TTGCC</b> <b>CCA</b> -----AGGATGAAGAAAGCT                     | 3             | CCA       | 4 7.1%          |
| 4c   | Lys2+   | bps C->A                     | AAAGTGT <b>TTGCC</b> <b>ACG</b> <b>T</b> <u>a</u> AGGGCCAAGGATGAAGAAAGCT |               |           | 4 7.1%          |
| 4c   | Lys2+   | bps G->T                     | AAAGTGT <b>TTGCC</b> <b>AC</b> <u>t</u> TCAGGGCCAAGGATGAAGAAAGCT         |               |           | 4 7.1%          |

| 4c          | Lys2-   | -13                          | AAAGTGT-----GCCAAGGATGAAGAAGCT                              | 1             | G         | 3               | 5.4%   |
|-------------|---------|------------------------------|-------------------------------------------------------------|---------------|-----------|-----------------|--------|
| 4c          | Lys2-   | +1                           | AAAGTGT <u>TTGCCC</u> ACGTCAGGGCCAAGGATGAAGAAGCT            |               |           | 2               | 3.6%   |
| 4c          | Lys2+   | bps T->A                     | AAAGTGT <u>TTGCCC</u> ACG <u>a</u> CAGGGCCAAGGATGAAGAAGCT   |               |           | 2               | 3.6%   |
| 4c          | Lys2+   | bps T->C                     | AAAGTGT <u>TTGCCC</u> ACG <u>c</u> CAGGGCCAAGGATGAAGAAGCT   |               |           | 2               | 3.6%   |
| 4c          | Lys2+   | -12                          | AAAGTGT <u>TTGCCC</u> -----AGGATGAAGAAGCT                   | 1             | A         | 1               | 1.8%   |
| 4c          | Lys2-   | -11                          | AAAGTGT <u>TTGCCC</u> ACG-----GATGAAGAAGCT                  | 1             | G         | 1               | 1.8%   |
| 4c          | Lys2-   | -5                           | AAAGTGT <u>TTGCCC</u> A-----GGGCCAAGGATGAAGAAGCT            | 2             | CA        | 1               | 1.8%   |
| 4c          | Lys2+   | -3                           | AAAGTGT <u>TTGCCC</u> AC---AGGGCCAAGGATGAAGAAGCT            | 1             | C         | 1               | 1.8%   |
| 4c          | Lys2-   | -1                           | AAAGTGT <u>TTGCC</u> -ACGTCAGGGCCAAGGATGAAGAAGCT            | 1             | C         | 1               | 1.8%   |
| 4c          | Lys2-   | -1                           | AAAGTGT <u>TTGCCC</u> AC-TCAGGGCCAAGGATGAAGAAGCT            |               |           | 1               | 1.8%   |
| 4c          | Lys2-   | -1                           | AAAGTGT <u>TTGCCC</u> ACGTC-GGGCCAAGGATGAAGAAGCT            |               |           | 1               | 1.8%   |
| 4c          | Lys2-   | +2                           | AAAGTGT <u>TTGCCC</u> ACG <u>GG</u> TCAGGGCCAAGGATGAAGAAGCT |               |           | 1               | 1.8%   |
| 4c          | Lys2-   | +2                           | AAAGTGT <u>TTGCCC</u> ACG <u>TT</u> TCAGGGCCAAGGATGAAGAAGCT |               |           | 1               | 1.8%   |
| 4c          | Lys2+   | bps GTC ->TTT                | AAAGTGT <u>TTGCCC</u> AC <u>ttt</u> AGGGCCAAGGATGAAGAAGCT   |               |           | 1               | 1.8%   |
| 4c          | Lys2+   | bps A->C                     | AAAGTGT <u>TTGCCC</u> ACGTCAGGGCCAAGG <u>c</u> TGAAGAAGCT   |               |           | 1               | 1.8%   |
| 4c          | Lys2+   | bps G->A                     | AAAGTGT <u>TTGCCC</u> ACGTC <u>a</u> GGCCAAGGATGAAGAAGCT    |               |           | 1               | 1.8%   |
| 4c          | Lys2+   | bps G->T                     | AAAGTGT <u>TTGCCC</u> ACGTCAGGGCCA <u>t</u> GATGAAGAAGCT    |               |           | 1               | 1.8%   |
| 4c          | Lys2+   | bps G->C                     | AAAGTGT <u>TTGCCC</u> ACGTCAGGGCCA <u>c</u> GATGAAGAAGCT    |               |           | 1               | 1.8%   |
| 4c          | Lys2+   | bps G->A                     | AAAGTGT <u>TTGCCC</u> AC <u>a</u> TCAGGGCCAAGGATGAAGAAGCT   |               |           | 1               | 1.8%   |
| 4c          | Lys2+   | bps G->A                     | AAAGTGT <u>TTGCCC</u> ACGTC <u>a</u> GGCCAAGGATGAAGAAGCT    |               |           | 1               | 1.8%   |
| 4c          | Lys2+   | bps G->T                     | AAAGTGT <u>TTGCCC</u> ACGTC <u>t</u> GGCCAAGGATGAAGAAGCT    |               |           | 1               | 1.8%   |
| 4c          | Lys2+   | bps C->G                     | AAAGTGT <u>TTGCCA</u> gTCAGGGCCAAGGATGAAGAAGCT              |               |           | 1               | 1.8%   |
| 4c          | Lys2+   | bps C->A                     | AAAGTGT <u>TTGCaC</u> ACGTCAGGGCCAAGGATGAAGAAGCT            |               |           | 1               | 1.8%   |
|             |         |                              |                                                             |               |           | 56              | 100.0% |
| gRNA        | Lys2+/- | Insertion(+)<br>Deletions(-) | Sequence                                                    | Microhomology | Frequency | %<br>Normalized |        |
| <i>pol4</i> |         |                              |                                                             |               |           |                 |        |
| 2w          | WT      | NA                           | TTCGAATGAAAGAGTAACCATTTGTTG <u>CGG</u> ACCAATTTACTCAATA     |               |           |                 |        |
| 2w          | Lys2+   | -3                           | TTCGAATGAAAGAGTAACCATTG--- <u>CGG</u> ACCAATTTACTCAATA      | 3             | TTG       | 103             | 94.5%  |
| 2w          | Lys2+   | -3                           | TTCGAATGAAAGAGTAACC---GTTG <u>CGG</u> ACCAATTTACTCAATA      |               |           | 3               | 2.8%   |
| 2w          | Lys2-   | -10                          | TTCGAATGAAAGAGTAACCATTG-----ATTTACTCAATA                    |               |           | 3               | 2.8%   |
|             |         |                              |                                                             |               |           | 109             | 100.0% |

| gRNA        | Lys2+/- | Insertion(+)<br>Deletions(-) | Sequence                                                  | Microhomology | Frequency | %<br>Normalized |
|-------------|---------|------------------------------|-----------------------------------------------------------|---------------|-----------|-----------------|
| <i>pol4</i> |         |                              |                                                           |               |           |                 |
| 2c          | WT      | NA                           | AAAGAGTAA <u>CCA</u> TTGTTGCGGACCAATTTACTCAATA            |               |           |                 |
| 2c          | Lys2-   | -1                           | AAAGAGTAA <u>CCA</u> TTGT-GCGGACCAATTTACTCAATA            | 1 T           | 45        | 64.3%           |
| 2c          | Lys2-   | -13                          | AAAGAGTAA <u>CCA</u> -----ATTTACTCAATA                    |               | 11        | 15.7%           |
| 2c          | Lys2-   | +1                           | AAAGAGTAA <u>CCA</u> TTGT <u>T</u> TTGCGGACCAATTTACTCAATA |               | 5         | 7.1%            |
| 2c          | Lys2-   | -13                          | AAAGAGTAA <u>CCA</u> TT-----TACTCAATA                     | 1 T           | 4         | 5.7%            |
| 2c          | Lys2+   | -3                           | AAAGAGTAA <u>CCA</u> TTGT---GGACCAATTTACTCAATA            |               | 3         | 4.3%            |
| 2c          | Lys2-   | -14                          | AAAGAGTAA <u>CCA</u> TT-----TACTCAATA                     | 2 TT          | 1         | 1.4%            |
| 2c          | Lys2+   | bps G ->A                    | AAAGAGTAA <u>CCA</u> TTGTTG <u>a</u> GGACCAATTTACTCAATA   |               | 1         | 1.4%            |
|             |         |                              |                                                           |               | 70        | 100.0%          |

| gRNA | CAN1+/- | Insertion(+)<br>Deletions(-) | Sequence                                                | Microhomology | Frequency | %<br>Normalized |
|------|---------|------------------------------|---------------------------------------------------------|---------------|-----------|-----------------|
| 1w   | WT      |                              | TGAAGCTTCACAAACACACCACAGCG <u>TGG</u> GTCAATACCATT      |               |           |                 |
| 1w   | Can1-   | +1                           | TGAAGCTTCACAAACACACCACAG <u>A</u> ACGTGGGTCAATACCATT    |               | 14        | 23%             |
| 1w   | Can1-   | +1                           | TGAAGCTTCACAAACACACCACA <u>G</u> GACGTGGGTCAATACCATT    |               | 10        | 17%             |
| 1w   | Can1-   | +1                           | TGAAGCTTCACAAACACACCACAG <u>T</u> ACGTGGGTCAATACCATT    |               | 8         | 13%             |
| 1w   | Can1+   | -21                          | TGAAGCTTCACAAA-----TACCATT                              |               | 4         | 7%              |
| 1w   | Can1-   | +2                           | TGAAGCTTCACAAACACACCACAG <u>AA</u> CGTGGGTCAATACCATT    |               | 3         | 5%              |
| 1w   | Can1+   | +3                           | TGAAGCTTCACAAACACACCACAG <u>AAA</u> CGTGGGTCAATACCATT   |               | 3         | 5%              |
| 1w   | Can1-   | -1                           | TGAAGCTTCACAAACACACCACAG-CGTGGGTCAATACCATT              |               | 3         | 5%              |
| 1w   | Can1+   | 1bps                         | TGAAGCTTCACAAACACACCACAG <u>C</u> CGTGGGTCAATACCATT     |               | 2         | 3%              |
| 1w   | Can1-   | +4                           | TGAAGCTTCACAAACACACCACAG <u>AAAA</u> ACGTGGGTCAATACCATT |               | 2         | 3%              |
| 1w   | Can1-   | +2                           | TGAAGCTTCACAAACACACCACAG <u>TT</u> ACGTGGGTCAATACCATT   |               | 2         | 3%              |
| 1w   | Can1-   | +2                           | TGAAGCTTCACAAACACACCACAG <u>CC</u> ACGTGGGTCAATACCATT   |               | 2         | 3%              |
| 1w   | Can1-   | -2                           | TGAAGCTTCACAAACACACCA--GACGTGGGTCAATACCATT              |               | 1         | 2%              |
| 1w   | Can1-   | -2                           | TGAAGCTTCACAAACACACCACA--CGTGGGTCAATACCATT              |               | 1         | 2%              |
| 1w   | Can1-   | +2                           | TGAAGCTTCACAAACACACCACAG <u>TA</u> ACGTGGGTCAATACCATT   |               | 1         | 2%              |
| 1w   | Can1-   | -19                          | TGAAGCTTCACAAACACACCA-----T                             |               | 1         | 2%              |
| 1w   | Can1-   | -1                           | TGAAGCTTCACAAACACACCACA-ACGTGGGTCAATACCATT              |               | 1         | 2%              |
| 1w   | Can1+   | +3                           | TGAAGCTTCACAAACACACCACAG <u>TTT</u> CGTGGGTCAATACCATT   |               | 1         | 2%              |
| 1w   | Can1+   | +3                           | TGAAGCTTCACAAACACACCACAG <u>CCC</u> CGTGGGTCAATACCATT   |               | 1         | 2%              |

| gRNA | CAN1+/- | Insertion(+)<br>Deletions(-) | Sequence                                               | Microhomology | 60<br>Frequency | 100%<br>%<br>Normalized |
|------|---------|------------------------------|--------------------------------------------------------|---------------|-----------------|-------------------------|
| 1c   | WT      |                              | TGAAGCTTCACAAACACA <u>CCA</u> CAGACGTGGGTCAATACCAT     |               |                 |                         |
| 1c   | Can1-   | +1                           | TGAAGCTTCACAAACACA <u>CCA</u> CAGAACGTGGGTCAATACCATT   |               | 64              | 70%                     |
| 1c   | Can1+   | -3                           | TGAAGCTTCACAAACACA <u>CCA</u> CAG---TGGGTCAATACCATT    | 1 G           | 9               | 10%                     |
| 1c   | Can1-   | -1                           | TGAAGCTTCACAAACACA <u>CCA</u> CAG-CGTGGGTCAATACCATT    |               | 2               | 2%                      |
| 1c   | Can1+   | 1bps                         | TGAAGCTTCACAAACACA <u>CCA</u> CAGCGTGGGTCAATACCATT     |               | 2               | 2%                      |
| 1c   | Can1-   | +1                           | TGAAGCTTCACAAACACA <u>CCA</u> CAGACCGTGGGTCAATACCATT   |               | 2               | 2%                      |
| 1c   | Can1-   | -2                           | TGAAGCTTCACAAACACA <u>CCA</u> CA--CGTGGGTCAATACCATT    | 1 A           | 2               | 2%                      |
| 1c   | Can1-   | -1                           | TGAAGCTTCACAAACACA <u>CCA</u> CA-ACGTGGGTCAATACCATT    |               | 1               | 1%                      |
| 1c   | Can1-   | -1                           | TGAAGCTTCACAAACACA <u>CCA</u> CAGACG-GGGTCAATACCATT    |               | 1               | 1%                      |
| 1c   | Can1+   | 1bps                         | TGAAGCTTCACAAACACA <u>CCA</u> CAGACGgGGGTCAATACCATT    |               | 1               | 1%                      |
| 1c   | Can1-   | +1                           | TGAAGCTTCACAAACACA <u>CCA</u> CAGTACGTGGGTCAATACCATT   |               | 1               | 1%                      |
| 1c   | Can1-   | +2                           | TGAAGCTTCACAAACACA <u>CCA</u> CAGAAACGTGGGTCAATACCATT  |               | 1               | 1%                      |
| 1c   | Can1+   | +3                           | TGAAGCTTCACAAACACA <u>CCA</u> CAGATAACGTGGGTCAATACCATT |               | 1               | 1%                      |
| 1c   | Can1-   | +1                           | TGAAGCTTCACAAACACA <u>CCA</u> CAGATCGTGGGTCAATACCATT   |               | 1               | 1%                      |
| 1c   | Can1-   | +2                           | TGAAGCTTCACAAACACA <u>CCA</u> CAGATTTCGTGGGTCAATACCATT |               | 1               | 1%                      |
| 1c   | Can1-   | +2                           | TGAAGCTTCACAAACACA <u>CCA</u> CAGGGACGTGGGTCAATACCATT  |               | 1               | 1%                      |
| 1c   | Can1+   | -18                          | TGAAGCTTCACAAACA-----ATACCATT                          | 2 CA          | 1               | 1%                      |
| 1c   | Can1-   | -19                          | TGAAGCTTCACAAACACA <u>CCA</u> -----TT                  | 4 ACCA        | 1               | 1%                      |
|      |         |                              |                                                        |               | 92              | 100%                    |

Supplemental Table 3

| gRNA | Lys2+/-      | Insertion(+)<br>Deletions(-) | Sequence                                                        | Microhomology | Average<br>Frequency | Sample<br>1  | Sample<br>2  | Sample<br>3  | Frequency<br>1 | Frequency<br>2 | Frequency<br>3 |
|------|--------------|------------------------------|-----------------------------------------------------------------|---------------|----------------------|--------------|--------------|--------------|----------------|----------------|----------------|
| 1w   | Lys-<br>WT F | NA                           | CCCTT <b>CCCAGAGAGAACCTGTGTGTG</b> <u>TGG</u> AGACTCCAACACTAAA  |               | 0.4%                 | 60           | 31           | 252          | 0.27%          | 0.15%          | 0.72%          |
| 1w   | Lys2-        | -14                          | CCCTTCCCAGAGAGAACCT-----CCAACACTAAA                             | 2 CT          | 20.5%                | 4120         | 3955         | 8480         | 18.55%         | 18.78%         | 24.29%         |
| 1w   | Lys2-        | -2                           | CCCTTCCCAGAGAGAACCTGT-- <u>TGTGG</u> AGACTCCAACACTAAA           | 2 GT          | 16.6%                | 3925         | 3315         | 5683         | 17.67%         | 15.74%         | 16.28%         |
| 1w   | Lys2-        | +1                           | CCCTTCCCAGAGAGAACCTGT <b>G</b> TT <u>TGG</u> AGACTCCAACACTAAA   |               | 16.2%                | 4147         | 3814         | 4174         | 18.67%         | 18.11%         | 11.95%         |
| 1w   | Lys2-        | -5                           | CCCTTCCCAGAGAGAACCTGTG----- <u>G</u> AGACTCCAACACTAAA           | 3 GTG         | 9.9%                 | 1885         | 2223         | 3762         | 8.49%          | 10.55%         | 10.77%         |
| 1w   | Lys2-        | -1                           | CCCTTCCCAGAGAGAACCTGT- <u>TGTGG</u> AGACTCCAACACTAAA            |               | 6.2%                 | 1366         | 1196         | 2312         | 6.15%          | 5.68%          | 6.62%          |
| 1w   | Lys2-        | +2                           | CCCTTCCCAGAGAGAACCTGTGG <b>TT</b> <u>TGG</u> AGACTCCAACACTAAA   |               | 4.4%                 | 742          | 1255         | 1352         | 3.34%          | 5.96%          | 3.87%          |
| 1w   | Lys2-        | -17                          | CCCTTCCCAGAGAGAAC-----AACACTAAA                                 | 2 CC          | 3.8%                 | 928          | 717          | 1313         | 4.18%          | 3.40%          | 3.76%          |
| 1w   | Lys2-        | +1                           | CCCTTCCCAGAGAGAACCTGT <b>G</b> <u>TGG</u> AGACTCCAACACTAAA      |               | 3.6%                 | 885          | 834          | 1041         | 3.98%          | 3.96%          | 2.98%          |
| 1w   | Lys2+        | -3                           | CCCTTCCCAGAGAGAACCTGTGT--- <u>GG</u> AGACTCCAACACTAAA           | 3 TGT         | 2.9%                 | 658          | 485          | 1201         | 2.96%          | 2.30%          | 3.44%          |
| 1w   | Lys2+        | -15                          | CCCTTCCCAGAGAGAAC-----CCAACACTAAA                               |               | 2.6%                 | 598          | 349          | 1226         | 2.69%          | 1.66%          | 3.51%          |
| 1w   | Lys2-        | -16                          | CCCTTCCCAGAGAG-----CTCCAACACTAAA                                | 4 GAGA        | 2.5%                 | 676          | 478          | 763          | 3.04%          | 2.27%          | 2.19%          |
| 1w   | Lys2-        | +2                           | CCCTTCCCAGAGAGAACCTGT <b>GG</b> TT <u>TGG</u> AGACTCCAACACTAAA  |               | 2.4%                 | 667          | 505          | 634          | 3.00%          | 2.40%          | 1.82%          |
| 1w   | Lys2-        | +1                           | CCCTTCCCAGAGAGAACCTGT <b>A</b> <u>TGG</u> AGACTCCAACACTAAA      |               | 2.2%                 | 440          | 530          | 699          | 1.98%          | 2.52%          | 2.00%          |
| 1w   | Lys2-        | -16                          | CCCTTCCCAGAGAGAACCT-----AACACTAAA                               |               | 1.8%                 | 387          | 352          | 725          | 1.74%          | 1.67%          | 2.08%          |
| 1W   | Lys2+        | +3                           | CCCTTCCCAGAGAGAACCTGTGG <b>TTT</b> <u>TGG</u> AGACTCCAACACTAAA  |               | 0.9%                 | 151          | 231          | 304          | 0.68%          | 1.10%          | 0.87%          |
| 1w   | Lys2-        | -1                           | CCCTTCCCAGAGAGAACCTGTGT- <u>TGG</u> AGACTCCAACACTAAA            | 1 G           | 0.9%                 | 170          | 133          | 409          | 0.77%          | 0.63%          | 1.17%          |
| 1w   | Lys2+        | -15                          | CCCTTCCCAGAGAGAACCT-----CAACACTAAA                              |               | 0.6%                 | 90           | 190          | 131          | 0.41%          | 0.90%          | 0.38%          |
| 1w   | Lys2-        | -16                          | CCCTTCCCAGAGAGAAC-----CAACACTAAA                                | 1 C           | 0.4%                 | 67           | 118          | 156          | 0.30%          | 0.56%          | 0.45%          |
| 1w   | Lys2+        | +3                           | CCCTTCCCAGAGAGAACCTGT <b>GGG</b> TT <u>TGG</u> AGACTCCAACACTAAA |               | 0.3%                 | 51           | 132          | 53           | 0.23%          | 0.63%          | 0.15%          |
| 1w   | Lys2-        | -14                          | CCCTTCCCAGAGAGAACCTG-----CAACACTAAA                             |               | 0.3%                 | 185          | 10           | 21           | 0.83%          | 0.05%          | 0.06%          |
| 1w   | Lys2-        | -13                          | CCCTTCCCAGAGAGAACCTG-----CCAACACTAAA                            | 1 T           | 0.2%                 | 1            | 115          | 0            | 0.00%          | 0.55%          | 0.00%          |
| 1w   | Lys2-        | -29                          | C-----ACTCCAACACTAAA                                            |               | 0.2%                 | 2            | 12           | 131          | 0.01%          | 0.06%          | 0.38%          |
| 1w   | Lys2+        | -28                          | CCCTTCC-----AACACTAAA                                           | 3 TCC         | 0.1%                 | 0            | 48           | 52           | 0.00%          | 0.23%          | 0.15%          |
| 1w   | Lys2-        | +4                           | CCCTTCCCAGAGAGAACCTGT <b>AAAA</b> <u>TGG</u> AGACTCCAACACTAAA   |               | 0.1%                 | 0            | 20           | 14           | 0.00%          | 0.09%          | 0.04%          |
|      |              |                              |                                                                 |               | <b>100.00%</b>       | <b>22150</b> | <b>21031</b> | <b>34666</b> | <b>100.0%</b>  | <b>100.00%</b> | <b>100.00%</b> |



|    | Lys2+/- | Insertion(+)<br>Deletions(-) | Sequence                                           | Microhomology    | Average<br>Frequency | Sample<br>4  | Sample<br>5  | Sample<br>6  | Frequency<br>4 | Frequency<br>5 | Frequency<br>6 |
|----|---------|------------------------------|----------------------------------------------------|------------------|----------------------|--------------|--------------|--------------|----------------|----------------|----------------|
|    | Lys+    |                              |                                                    |                  |                      |              |              |              |                |                |                |
| 1c | WT R    | NA                           | GAGAA <u>CCT</u> GTGTTGTGGAGACTCCAACACTAAATTCGACA  |                  | 3.7%                 | 613          | 787          | 373          | 3.56%          | 4.17%          | 3.37%          |
| 1c | Lys2-   | -14                          | GAGAA <u>CCT</u> -----CCAACACTAAATTCGACA           | 2 CT             | 27.7%                | 4423         | 5344         | 3211         | 25.68%         | 28.30%         | 29.05%         |
| 1c | Lys2-   | +1                           | GAGAA <u>CCT</u> GTGTTGTGGAGACTCCAACACTAAATTCGACA  |                  | 21.1%                | 3637         | 4131         | 2228         | 21.11%         | 21.87%         | 20.16%         |
| 1c | Lys2-   | -1                           | GAGAA <u>CCT</u> GTG-TGTGGAGACTCCAACACTAAATTCGACA  | 1 T              | 9.0%                 | 1625         | 1545         | 1035         | 9.43%          | 8.18%          | 9.36%          |
| 1c | Lys2-   | +1                           | GAGAA <u>CCT</u> GTGTTGTGGAGACTCCAACACTAAATTCGACA  |                  | 7.0%                 | 1366         | 1182         | 747          | 7.93%          | 6.26%          | 6.76%          |
| 1c | Lys2+   | -3                           | GAGAA <u>CCT</u> GTGT---GGAGACTCCAACACTAAATTCGACA  | 3 TGT            | 5.7%                 | 1241         | 940          | 555          | 7.20%          | 4.98%          | 5.02%          |
| 1c | Lys2-   | -2                           | GAGAA <u>CCT</u> GT--TGTGGAGACTCCAACACTAAATTCGACA  | 2 GT             | 5.0%                 | 877          | 823          | 612          | 5.09%          | 4.36%          | 5.54%          |
| 1c | Lys2-   | -5                           | GAGAA <u>CCT</u> GTG-----GAGACTCCAACACTAAATTCGACA  | 2 TG             | 3.9%                 | 704          | 747          | 390          | 4.09%          | 3.96%          | 3.53%          |
| 1c | Lys2-   | -16                          | GAGA-----CTCCAACACTAAATTCGACA                      | 4 GAGA           | 3.3%                 | 458          | 755          | 373          | 2.66%          | 4.00%          | 3.37%          |
| 1c | Lys2-   | -23                          | GAGAA <u>CCT</u> -----AATTCGACA                    |                  | 3.3%                 | 458          | 755          | 373          | 2.66%          | 4.00%          | 3.37%          |
| 1c | Lys2+   | -15                          | GAGAA <u>CC</u> -----CCAACACTAAATTCGACA            | 13549            | 2.4%                 | 407          | 491          | 255          | 2.36%          | 2.60%          | 2.31%          |
| 1c | Lys2-   | -16                          | GAGAA <u>CCT</u> -----AACACTAAATTCGACA             | 9996 0.737766625 | 2.2%                 | 289          | 429          | 294          | 1.68%          | 2.27%          | 2.66%          |
| 1c | Lys2-   | +2                           | GAGAA <u>CCT</u> GTGTTTGTGGAGACTCCAACACTAAATTCGACA |                  | 1.6%                 | 270          | 307          | 162          | 1.57%          | 1.63%          | 1.47%          |
| 1c | Lys2-   | +2                           | GAGAA <u>CCT</u> GTGTTTGTGGAGACTCCAACACTAAATTCGACA |                  | 1.4%                 | 278          | 299          | 118          | 1.61%          | 1.58%          | 1.07%          |
| 1c | Lys2-   | +1                           | GAGAA <u>CCT</u> GTGTTTGTGGAGACTCCAACACTAAATTCGACA |                  | 0.6%                 | 140          | 11           | 107          | 0.81%          | 0.06%          | 0.97%          |
| 1c | Lys2+   | +3                           | GAGAA <u>CCT</u> GTGTTTGTGGAGACTCCAACACTAAATTCGACA |                  | 0.6%                 | 161          | 52           | 50           | 0.93%          | 0.28%          | 0.45%          |
| 1c | Lys2-   | -17                          | GAGAA <u>CC</u> -----AACACTAAATTCGACA              | 2 CC             | 0.4%                 | 55           | 83           | 32           | 0.32%          | 0.44%          | 0.29%          |
| 1c | Lys2-   | -14                          | GAGAA <u>CCT</u> G-----CAACACTAAATTCGACA           |                  | 0.3%                 | 77           | 50           | 31           | 0.45%          | 0.26%          | 0.28%          |
| 1c | Lys2+   | -15                          | GAGAA <u>CC</u> -----CACTAAATTCGACA                |                  | 0.3%                 | 33           | 56           | 52           | 0.19%          | 0.30%          | 0.47%          |
| 1c | Lys2+   | -28                          | -----AACACTAAATTCGACA                              | 3 TCC            | 0.3%                 | 52           | 71           | 29           | 0.30%          | 0.38%          | 0.26%          |
| 1c | Lys2+   | +3                           | GAGAA <u>CCT</u> GTGTTTGTGGAGACTCCAACACTAAATTCGACA |                  | 0.1%                 | 31           | 7            | 13           | 0.18%          | 0.04%          | 0.12%          |
| 1c | Lys2+   | -15                          | GAGAA <u>CCT</u> -----CAACACTAAATTCGACA            |                  | 0.1%                 | 22           | 17           | 5            | 0.13%          | 0.09%          | 0.05%          |
|    |         |                              |                                                    |                  | <b>100.00%</b>       | <b>16613</b> | <b>18099</b> | <b>10681</b> | <b>100.0%</b>  | <b>100.00%</b> | <b>100.00%</b> |

| gRNA | Lys2+/-  | Insertion(+) Deletions(-) | Sequence                                        | Microhomology | Reads | % Normalized |
|------|----------|---------------------------|-------------------------------------------------|---------------|-------|--------------|
| 4W   | Lys2+ WT | NA                        | TCAAAGTGTTTGCCACGTCAGGGCCAAGGATGAAGAAGCTGCATT   |               | 22    | 0.65%        |
| 4w   | Lys2-    | +1                        | TCAAAGTGTTTGCCACGGTCAAGGGCCAAGGATGAAGAAGCTGCATT |               | 756   | 22.26%       |
| 4w   | Lys2-    | -11                       | TCAAAGTGTTTGCCCA-----AGGATGAAGAAGCTGCATT        | 2 CA          | 697   | 20.52%       |
| 4w   | Lys2-    | -1                        | TCAAAGTGTTTGCCAC-TCAAGGGCCAAGGATGAAGAAGCTGCATT  |               | 669   | 19.70%       |
| 4w   | Lys2+    | -12                       | TCAAAGTGTTTGCC-----AAGGATGAAGAAGCTGCATT         | 2 CC          | 355   | 10.45%       |
| 4w   | Lys2-    | +2                        | TCAAAGTGTTTGCCACCGTCAGGGCCAAGGATGAAGAAGCTGCATT  |               | 198   | 5.83%        |
| 4w   | Lys2-    | -16                       | TCAAAG-----GGCCAAGGATGAAGAAGCTGCATT             | 1 G           | 108   | 3.18%        |
| 4w   | Lys2-    | -10                       | TCAAAGTGT-----CAAGGGCCAAGGATGAAGAAGCTGCATT      | 2 GT          | 82    | 2.41%        |
| 4w   | Lys2-    | +1                        | TCAAAGTGTTTGCCACGTCAGGGCCAAGGATGAAGAAGCTGCATT   |               | 43    | 1.27%        |
| 4w   | Lys2+    | 1bps C->T                 | TCAAAGTGTTTGCCCA+GTCAGGGCCAAGGATGAAGAAGCTGCATT  |               | 42    | 1.24%        |
| 4w   | Lys2-    | -1                        | TCAAAGTGTTTGCC-ACGTCAGGGCCAAGGATGAAGAAGCTGCATT  | 1 C           | 33    | 0.97%        |
| 4w   | Lys2+    | -30                       | TCAAAGTGTTTGC-----ATT                           | 1 C           | 32    | 0.94%        |
| 4w   | Lys2+    | -12                       | TCAAAGTGTTTGCC-----AGGATGAAGAAGCTGCATT          | 1 A           | 30    | 0.88%        |
| 4w   | Lys2-    | -11                       | TCAAAGTGTTTGCCACG-----GATGAAGAAGCTGCATT         | 1 G           | 30    | 0.88%        |
| 4w   | Lys2-    | +2                        | TCAAAGTGTTTGCCACGTCAGGGCCAAGGATGAAGAAGCTGCATT   |               | 29    | 0.85%        |
| 4w   | Lys2-    | +2                        | TCAAAGTGTTTGCCACGGTCAAGGGCCAAGGATGAAGAAGCTGCATT |               | 28    | 0.82%        |
| 4w   | Lys2-    | -5                        | TCAAAGTGTTTGCCCA-----GGGCCAAGGATGAAGAAGCTGCATT  | 2 CA          | 26    | 0.77%        |
| 4w   | Lys2-    | -2                        | TCAAAGTGTTTGCCCA--TCAAGGGCCAAGGATGAAGAAGCTGCATT |               | 19    | 0.56%        |
| 4w   | Lys2-    | +1                        | TCAAAGTGTTTGCCACCGTCAAGGGCCAAGGATGAAGAAGCTGCATT |               | 19    | 0.56%        |
| 4w   | Lys2+    | -6                        | TCAAAGTGTTTGCCAC-----GCCAAGGATGAAGAAGCTGCATT    | 1 G           | 15    | 0.44%        |
| 4w   | Lys2+    | -18                       | TCA-----GGGCCAAGGATGAAGAAGCTGCATT               | 1 A           | 13    | 0.38%        |
| 4w   | Lys2-    | -4                        | TCAAAGTGTTTGCC----TCAAGGGCCAAGGATGAAGAAGCTGCATT |               | 11    | 0.32%        |
| 4w   | Lys2-    | -22                       | TCAAAGTGT-----GAAGAAGCTGCATT                    | 1 T           | 11    | 0.32%        |
| 4w   | Lys2-    | +1                        | TCAAAGTGTTTGCCACGTCAGGGCCAAGGATGAAGAAGCTGCATT   |               | 11    | 0.32%        |
| 4w   | Lys2-    | -7                        | TCAAAGTGTTTGC-----AGGGCCAAGGATGAAGAAGCTGCATT    | 1 C           | 10    | 0.29%        |
| 4w   | Lys2+    | -21                       | TCAAAGTGTTTG-----AAGAAGCTGCATT                  | 2 TG          | 10    | 0.29%        |
| 4w   | Lys2-    | -25                       | TCAAAGTG-----AAGAAGCTGCATT                      | 2 TG          | 10    | 0.29%        |

|    |       |           |                                                           |   |   |             |                |
|----|-------|-----------|-----------------------------------------------------------|---|---|-------------|----------------|
| 4w | Lys2+ | -6        | TCAAAGTGTTTGCC-----AGGGCCAAGGATGAAGAAGCTGCATT             | 1 | C | 9           | 0.27%          |
| 4w | Lys2- | +1        | TCAAAGTGTTTGCCAC <b>T</b> GTCAGGGCCAAGGATGAAGAAGCTGCATT   |   |   | 9           | 0.27%          |
| 4w | Lys2- | -10       | TCAAAGTGTTTGCC-----CAAGGATGAAGAAGCTGCATT                  | 1 | C | 8           | 0.24%          |
| 4w | Lys2- | +1        | TCAAAGTGTTTGCCAC <b>A</b> TCAAGGGCCAAGGATGAAGAAGCTGCATT   |   |   | 7           | 0.21%          |
| 4w | Lys2- | -1        | TCAAAGTGTTTGCCCA-GTCAGGGCCAAGGATGAAGAAGCTGCATT            |   |   | 6           | 0.18%          |
| 4w | Lys2+ | -6        | TCAAAGTGTTTG-----TCAAGGGCCAAGGATGAAGAAGCTGCATT            | 1 | G | 6           | 0.18%          |
| 4w | Lys2+ | 1bps G->A | TCAAAGTGTTTGCCCA <b>a</b> TCAAGGGCCAAGGATGAAGAAGCTGCATT   |   |   | 6           | 0.18%          |
| 4w | Lys2+ | 1bps G->T | TCAAAGTGTTTGCCCA <b>t</b> TCAAGGGCCAAGGATGAAGAAGCTGCATT   |   |   | 6           | 0.18%          |
| 4w | Lys2+ | -3        | TCAAAGTGTTTGCCACG---GGGCCAAGGATGAAGAAGCTGCATT             |   |   | 4           | 0.12%          |
| 4w | Lys2+ | -12       | TCAAAGTG-----AGGGCCAAGGATGAAGAAGCTGCATT                   |   |   | 4           | 0.12%          |
| 4w | Lys2+ | 1bps G->T | TCAAAGTGTTT <b>t</b> CCCACGTCAAGGGCCAAGGATGAAGAAGCTGCATT  |   |   | 4           | 0.12%          |
| 4w | Lys2+ | 1bps C->A | TCAAAGTGTTTGCC <b>a</b> ACGTCAAGGGCCAAGGATGAAGAAGCTGCATT  |   |   | 3           | 0.09%          |
| 4w | Lys2- | -2        | TCAAAGTGTTTGCC--GTCAGGGCCAAGGATGAAGAAGCTGCATT             | 1 | C | 2           | 0.06%          |
| 4w | Lys2- | -5        | TCAAAGTGTTTGC-----TCAAGGGCCAAGGATGAAGAAGCTGCATT           |   |   | 2           | 0.06%          |
| 4w | Lys2- | -8        | TCAAAGTGTTTGCCAC-----CAAGGATGAAGAAGCTGCATT                | 1 | C | 2           | 0.06%          |
| 4w | Lys2- | -1        | TCAAAGTGTTTGCCACG-CAAGGGCCAAGGATGAAGAAGCTGCATT            |   |   | 2           | 0.06%          |
| 4w | Lys2+ | -9        | TCAAAGTGT-----CAAGGGCCAAGGATGAAGAAGCTGCATT                | 1 | T | 2           | 0.06%          |
| 4w | Lys2+ | +3        | TCAAAGTGTTTGCCAC <b>GGG</b> GTCAGGGCCAAGGATGAAGAAGCTGCATT |   |   | 2           | 0.06%          |
| 4w | Lys2- | -2        | TCAAAGTGTTTGCCAC--CAAGGGCCAAGGATGAAGAAGCTGCATT            |   |   | 1           | 0.03%          |
| 4w | Lys2- | +2        | TCAAAGTGTTTGCCACG <b>TT</b> TCAAGGGCCAAGGATGAAGAAGCTGCATT |   |   | 1           | 0.03%          |
| 4w | Lys2+ | 1bps T->G | TCAAAGTGTTTGCCAC <b>g</b> GCAAGGGCCAAGGATGAAGAAGCTGCATT   |   |   | 1           | 0.03%          |
|    |       |           |                                                           |   |   | <b>3396</b> | <b>100.00%</b> |

| gRNA      | Lys2+/-         | Insertion(+) Deletions(-) | Sequence                                                         | Microhomology | Frequency | % Normalized |        |
|-----------|-----------------|---------------------------|------------------------------------------------------------------|---------------|-----------|--------------|--------|
| <b>4C</b> | <b>Lys2+ WT</b> | NA                        | TCAAAGTGTTTG <b>CCC</b> ACGT <b>CAGGGCCAAGGATGAA</b> GAAGCTGCATT |               | <b>95</b> | <b>6.25%</b> |        |
| 4c        | Lys2-           | -11                       | TCAAAGTGTTTG <b>CCCA</b> -----AGGATGAAGAAGCTGCATT                | 1             | A         | 213          | 14.00% |
| 4c        | Lys2+           | 1bps C->A                 | TCAAAGTGTTTG <b>CCC</b> ACGT <b>a</b> AGGGCCAAGGATGAAGAAGCTGCATT |               |           | 183          | 12.03% |

|    |       |                       |                                                                    |      |     |       |
|----|-------|-----------------------|--------------------------------------------------------------------|------|-----|-------|
| 4c | Lys2- | +1                    | TCAAAGTGT <b>TTGCCACGG</b> TCAGGGCCAAGGATGAAGAAGCTGCATT            |      | 149 | 9.80% |
| 4c | Lys2+ | -12                   | TCAAAGTGT <b>TTGCCAC</b> -----GATGAAGAAGCTGCATT                    | 1 G  | 147 | 9.66% |
| 4c | Lys2+ | 1bps C->A             | TCAAAGTGT <b>TTGCCAa</b> GTCAGGGCCAAGGATGAAGAAGCTGCATT             |      | 114 | 7.50% |
| 4c | Lys2+ | 1bps C->T             | TCAAAGTGT <b>TTGCC</b> tCGTCAGGGCCAAGGATGAAGAAGCTGCATT             |      | 107 | 7.03% |
| 4c | Lys2+ | -12                   | TCAAAGTGT <b>TTGCC</b> -----AAGGATGAAGAAGCTGCATT                   | 2 CC | 69  | 4.54% |
| 4c | Lys2+ | 1bps G-> C            | TCAAAGTGT <b>TTGCCAc</b> CTCAGGGCCAAGGATGAAGAAGCTGCATT             |      | 50  | 3.29% |
| 4c | Lys2+ | +3                    | TCAAAGTGT <b>TTGCCACGGG</b> GTCAGGGCCAAGGATGAAGAAGCTGCATT          |      | 47  | 3.09% |
| 4c | Lys2+ | 6bps ATGAAGA->AGGTGAT | TCAAAGTGT <b>TTGCCAC</b> GCAGGGCCAAGGA <b>agGtgat</b> AGCTGCATT    |      | 39  | 2.56% |
| 4c | Lys2+ | 2bps CAA->GAG         | TCAAAGTGT <b>TTGCCAC</b> GCAGGGC <b>gag</b> GGATGAAGAAGCTGCATT     |      | 37  | 2.43% |
| 4c | Lys2- | +2                    | TCAAAGTGT <b>TTGCCAC</b> GT <b>TTCA</b> GGCCAAGGATGAAGAAGCTGCATT   |      | 35  | 2.30% |
| 4c | Lys2+ | 1bps A->T             | TCAAAGTGT <b>TTGCC</b> tCGTCAGGGCCAAGGATGAAGAAGCTGCATT             |      | 31  | 2.04% |
| 4c | Lys2+ | 1bps G->T             | TCAAAGTGT <b>TTGCCAC</b> tTCAGGGCCAAGGATGAAGAAGCTGCATT             |      | 20  | 1.31% |
| 4c | Lys2+ | 1bps C->T             | TCAAAGTGT <b>TTGCC</b> tCACGCAGGGCCAAGGATGAAGAAGCTGCATT            |      | 19  | 1.25% |
| 4c | Lys2- | +1                    | TCAAAGTGT <b>TTGCCACGA</b> TCAGGGCCAAGGATGAAGAAGCTGCATT            |      | 18  | 1.18% |
| 4c | Lys2+ | 1bps G-> C            | TCAAAGTGT <b>TTGCCAC</b> GCAGG <b>c</b> CCAAGGATGAAGAAGCTGCATT     |      | 18  | 1.18% |
| 4c | Lys2+ | 1bps G-> C            | TCAAAGTGT <b>TTGCCAC</b> GCAG <b>c</b> GGCCAAGGATGAAGAAGCTGCATT    |      | 18  | 1.18% |
| 4c | Lys2- | -1                    | TCAAAGTGT <b>TTGCC</b> -ACGTCAGGGCCAAGGATGAAGAAGCTGCATT            |      | 14  | 0.92% |
| 4c | Lys2- | -1                    | TCAAAGTGT <b>TTGCCAC</b> GCAGGGCC-AGGATGAAGAAGCTGCATT              |      | 13  | 0.85% |
| 4c | Lys2+ | 4bps CCCAC->GGGAA     | TCAAAGTGT <b>TTGgggAa</b> CGTCAGGGCCAAGGATGAAGAAGCTGCATT           |      | 10  | 0.66% |
| 4c | Lys2+ | 1bps C->G             | TCAAAGTGT <b>TTGCCAC</b> GT <b>g</b> AGGGCCAAGGATGAAGAAGCTGCATT    |      | 10  | 0.66% |
| 4c | Lys2+ | 1bps T->G             | TCAAAGTGT <b>TTGCCAC</b> gCAGGGCCAAGGATGAAGAAGCTGCATT              |      | 10  | 0.66% |
| 4c | Lys2- | -1                    | TCAAAGTGT <b>TTGCCAC</b> G-CAGGGCCAAGGATGAAGAAGCTGCATT             | 1 G  | 8   | 0.53% |
| 4c | Lys2- | -2                    | TCAAAGTGT <b>TTGCCAC</b> --CAGGGCCAAGGATGAAGAAGCTGCATT             |      | 7   | 0.46% |
| 4c | Lys2- | -1                    | TCAAAGTGT <b>TTGCCAC</b> GCAGTCA-GGCCAAGGATGAAGAAGCTGCATT          | 1 G  | 6   | 0.39% |
| 4c | Lys2+ | 7bps GTCAGGG->ACCACAC | TCAAAGTGT <b>TTGCCacACcac</b> ACCCAAGGATGAAGAAGCTGCATT             |      | 6   | 0.39% |
| 4c | Lys2+ | 1bps G-> T            | TCAAAGTGT <b>TTGCCAC</b> GCAGTCA <b>t</b> GGCCAAGGATGAAGAAGCTGCATT |      | 6   | 0.39% |
| 4c | Lys2+ | -12                   | TCAAAGTGT <b>TTGCC</b> -----AGGATGAAGAAGCTGCATT                    | 1 A  | 5   | 0.33% |
| 4c | Lys2- | +2                    | TCAAAGTGT <b>TTGCCACGG</b> TCAGGGCCAAGGATGAAGAAGCTGCATT            |      | 4   | 0.26% |

|    |       |           |                                                                  |             |                |
|----|-------|-----------|------------------------------------------------------------------|-------------|----------------|
| 4c | Lys2- | -16       | TCAAAG-----GGCCAAGGATGAAGAAGCTGCATT                              | 2           | 0.13%          |
| 4c | Lys2- | +1        | TCAAAGTGTTTG <u>CCCAC</u> <b>C</b> GTCAGGGCCAAGGATGAAGAAGCTGCATT | 2           | 0.13%          |
| 4c | Lys2- | +1        | TCAAAGTGTTTG <u>CCCAC</u> <b>T</b> GTCAGGGCCAAGGATGAAGAAGCTGCATT | 2           | 0.13%          |
| 4c | Lys2+ | 1bps C->A | TCAAAGTGTTTG <u>CCCAC</u> GTCAGGGC <b>a</b> AAGGATGAAGAAGCTGCATT | 2           | 0.13%          |
| 4c | Lys2+ | 1bps C->T | TCAAAGTGTTTG <u>CCCA</u> <b>t</b> GTCAGGGCCAAGGATGAAGAAGCTGCATT  | 2           | 0.13%          |
| 4c | Lys2+ | 1bps G->A | TCAAAGTGTTTG <u>CCCAC</u> <b>a</b> TCAGGGCCAAGGATGAAGAAGCTGCATT  | 2           | 0.13%          |
| 4c | Lys2+ | -6        | TCAAAGTGTTTG <u>CCCAC</u> -----GCCAAGGATGAAGAAGCTGCATT           | 1           | 0.07%          |
|    |       |           |                                                                  | <b>1521</b> | <b>100.00%</b> |

1 G

**Suppl. Table 4: Percent of survivors with one or more bases inserted.**

Sequence data are presented in Suppl. Table 2. Data for LYS2-1 and LYS2-4 reflect Illumina sequencing with thousands of reads, whereas those for LYS2-2, LYS2-3 and CAN1-1 are based on approximately 100 individual sequences.

**A Percent insertions**

| Bases Inserted | gLYS2-1 <sup>W</sup> | gLYS2-1 <sup>C</sup> | gLYS2-2 <sup>W</sup> | gLYS2-2 <sup>C</sup> | gLYS2-3 <sup>W</sup> | gLYS2-3 <sup>C</sup> | gLYS2-4 <sup>W</sup> | gLYS2-4 <sup>C</sup> | gCAN1-1 <sup>W</sup> | gCAN1-1 <sup>C</sup> |
|----------------|----------------------|----------------------|----------------------|----------------------|----------------------|----------------------|----------------------|----------------------|----------------------|----------------------|
| +1 predicted   | 16                   | 21                   | 10                   | 36                   | 0                    | 51                   | 22                   | 0                    | 23                   | 70                   |
| +1 other       | 2                    | 8                    | 14                   | 11                   | 0                    | 0                    | 3                    | 11                   | 27                   | 4                    |
| +2             | 7                    | 2                    | 10                   | 10                   | 3                    | 0                    | 8                    | 3                    | 13                   | 3                    |
| +3             | 1                    | 1                    | 5                    | 9                    | 2                    | 0                    | 0                    | 3                    | 9                    | 1                    |

**B Percent homonucleotide insertions**

| Bases Inserted | gLYS2-1 <sup>W</sup> | gLYS2-1 <sup>C</sup> | gLYS2-2 <sup>W</sup> | gLYS2-2 <sup>C</sup> | gLYS2-3 <sup>W</sup> | gLYS2-3 <sup>C</sup> | gLYS2-4 <sup>W</sup> | gLYS2-4 <sup>C</sup> | gCAN1-1 <sup>W</sup> | gCAN1-1 <sup>C</sup> |
|----------------|----------------------|----------------------|----------------------|----------------------|----------------------|----------------------|----------------------|----------------------|----------------------|----------------------|
| +2             | 100                  | 100                  | 100                  | 100                  | 100                  | 0                    | 12                   | 100                  | 85                   | 100                  |
| +3             | 100                  | 100                  | 60                   | 89                   | 100                  | 0                    | 0                    | 100                  | 100                  | 100                  |
